# Supplementary material for: Air-pollution-satellite-based CO 2 emission inversion: system evaluation, sensitivity analysis, and future research direction
Source: Copernicus journal article supplement (doi:10.5194/acp-25-1949-2025), 2025-02-13
Supplement: Supplementary file 1 [file acp-25-1949-2025-supplement.pdf]

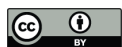

*Supplement of*

## **Air-pollution-satellite-based CO<sub>2</sub> emission inversion: system evaluation, sensitivity analysis, and future research direction**

**Hui Li et al.**

*Correspondence to:* Bo Zheng (bozheng@sz.tsinghua.edu.cn)

The copyright of individual parts of the supplement might differ from the article licence.

## 16 **Section S1. Bottom-up estimates**

17 To derive a sector-specific prior, we update the 2019 Multi-resolution Emission Inventory  
18 for China (MEIC) (Zheng et al., 2018) using a range of activity data. The bottom-up  
19 estimation follows two primary steps: first, we apply monthly updates based on year-on-  
20 year national activity ratios obtained from the National Bureau of Statistics  
21 (<https://data.stats.gov.cn/english/easyquery.htm?cn=C01>); second, we disaggregate  
22 monthly emissions into daily estimates using multi-source data. The specific data sources  
23 used in this bottom-up approach are detailed in Table S1.

24 For emission factors (EFs), we assume a yearly halving of the reduction rate in NO<sub>x</sub> EFs.  
25 Since 2012, NO<sub>x</sub> emissions have sharply decreased due to effective pollution control  
26 measures with many end-of-pipe devices; however, the rate of decline has slowed in recent  
27 years, reflecting the diminishing potential for further reductions (Geng et al., 2024; Li et  
28 al., 2023). As such, the default assumption is that the reduction rate in NO<sub>x</sub> EFs halves each  
29 year, consistent with the limited potential for continued reductions. By contrast, CO<sub>2</sub> EFs  
30 are assumed to remain constant over time, as they are primarily influenced by fuel type and  
31 combustion conditions (Cheng et al., 2021).

32

## 33 **Section S2. CO<sub>2</sub>-to-NO<sub>x</sub> emission ratios**

34 In this inversion system, the CO<sub>2</sub>-to-NO<sub>x</sub> emission ratios (ERs) are initially derived from  
35 the 2019 MEIC inventory, then updated for the target year (2022 in this study) by assuming  
36 a specific reduction in NO<sub>x</sub> EFs by sector while keeping CO<sub>2</sub> EFs constant. This approach  
37 aligns with the ongoing decline in NO<sub>x</sub> emissions due to pollution control measures, while  
38 CO<sub>2</sub> emissions remain more closely tied to fuel type and combustion conditions (Text S1).  
39 Accordingly, the CO<sub>2</sub>-to-NO<sub>x</sub> ERs are dependent on the reduction ratio of NO<sub>x</sub> EFs in this  
40 system (represented by the  $rNO_{x,s,i,y}$  in Eq. 5).

41 The reduction ratio of NO<sub>x</sub> EFs first influences the disaggregation of total NO<sub>x</sub> emissions  
42 to sectors, and then affects the sector-specific conversion from NO<sub>x</sub> to CO<sub>2</sub> emissions. To  
43 evaluate this impact, we set a gradient test with a NO<sub>x</sub> EFs reduction range from 1% to 10%  
44 ( $ef_{[-10\%, -1\%]}$ ). Results indicate a notable impact on CO<sub>2</sub> emissions, affecting annual  
45 national CO<sub>2</sub> totals by up to 10.7% (Details discussed in Manuscript). This finding  
46 emphasizes the need for a more precise approach to setting NO<sub>x</sub> emission reduction ratios

47 in future refinements, such as incorporating an iterative adjustment within the bottom-up  
48 process to better align bottom-up and TROPOMI-constrained sectoral NO<sub>x</sub> emissions (as  
49 mentioned in the Discussion).

50 We further compare the CO<sub>2</sub>-to-NO<sub>x</sub> ERs of MEIC with some international inventories,  
51 including the Emissions Database for Global Atmospheric Research (EDGAR,  
52 [https://edgar.jrc.ec.europa.eu/dataset\\_ap81](https://edgar.jrc.ec.europa.eu/dataset_ap81)) (Crippa et al., 2020) and the Community  
53 Emissions Data System (CEDS) (Mcduffie et al., 2020), for the year 2019. Given the  
54 different categorization structures in these inventories, we focus on comparing the overall  
55 CO<sub>2</sub>-to-NO<sub>x</sub> ERs, which are 493.7 for MEIC, 571.5 for EDGAR, and 462.6 for CEDS. The  
56 emission factors in MEIC are more spatially and sectorally refined for China, making its  
57 CO<sub>2</sub>-to-NO<sub>x</sub> ERs more representative of China-specific emissions (Zheng et al., 2018).

58

### 59 **Section S3. Tests affecting NO<sub>x</sub> and CO<sub>2</sub> emissions result in similar impacts**

60 Among tests, Res\_2×2.5 and 2021\_base are the most influential ones, triggering  $\overline{RC}_i \pm 1\sigma$ ,  
61 of -2.8%±6.2% (-1.2%±6.0%) and 0.5%±8.6% (-0.6%±6.9%) in daily national total NO<sub>x</sub>  
62 (CO<sub>2</sub>) emissions, respectively. Trop\_fill and Trop\_v2.3 come next, causing variations of  
63 1.1%±5.3% (1.3%±3.9%) and -0.5%±6.7% (-0.4%±5.9%) in daily national total NO<sub>x</sub> (CO<sub>2</sub>)  
64 emissions. In contrast,  $\beta_{[-20\%, 20\%]}$  leads to notable but consistent variations in NO<sub>x</sub> and  
65 CO<sub>2</sub>, linearly strengthening its impact as the adjustment amplitude increases, wherein  $\beta_{-}$   
66 20% triggers 3.0%±3.2% in NO<sub>x</sub> emissions and 2.6%±3.0% in CO<sub>2</sub> emissions (Fig. S7).

67

### 68 **Section S4. Response of sectoral NO<sub>x</sub> emissions to tests**

69 The residential sector is the most vulnerable to 2021\_base, with variations up to -6.0%±6.7%  
70 in daily NO<sub>x</sub> emissions. Residential emissions exclusively present sensitivity to 4\_sectors,  
71 thre\_04, and thre\_06, with variations of -6.1%±2.5%, 7.4%±7.8%, and -6.4%±5.6% in its  
72 NO<sub>x</sub> emissions, respectively. The industry and transport emissions are more sensitive to  
73 the  $\beta_{[-20\%, 20\%]}$ , with  $\overline{RC}_s \pm 1\sigma_s$  up to 4.1%±4.5% and 4.5%±6.1% in NO<sub>x</sub> emissions  
74 under  $\beta_{-20\%}$ . Res\_2×2.5 incurs the  $\overline{RC}_s \pm 1\sigma_s$  of -8.3%±12.4% and -2.7%±8.8% in daily  
75 national NO<sub>x</sub> emissions in transport and power sectors, respectively.

76

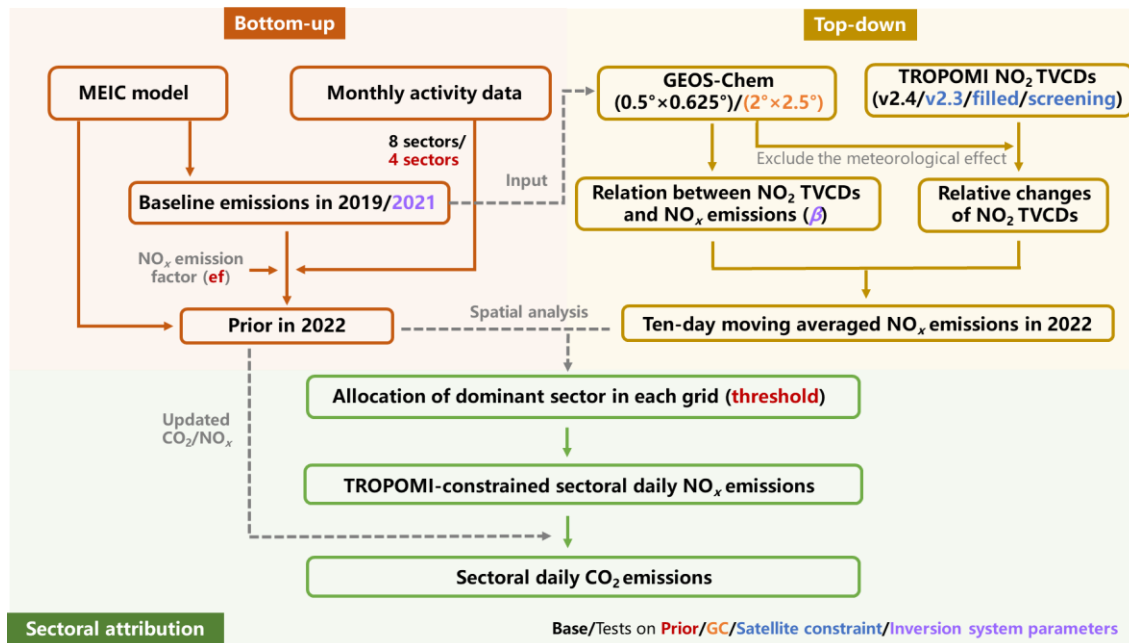

77

78 **Figure S1. The methodology of the inversion system and the tests we introduced.**  
 79 Sensitivity tests include prior (red labeled), model resolution (orange labeled), satellite data  
 80 (blue labeled), and inversion system parameters (purple labeled). Detailed settings are seen  
 81 in Tables 1 and 2.

82

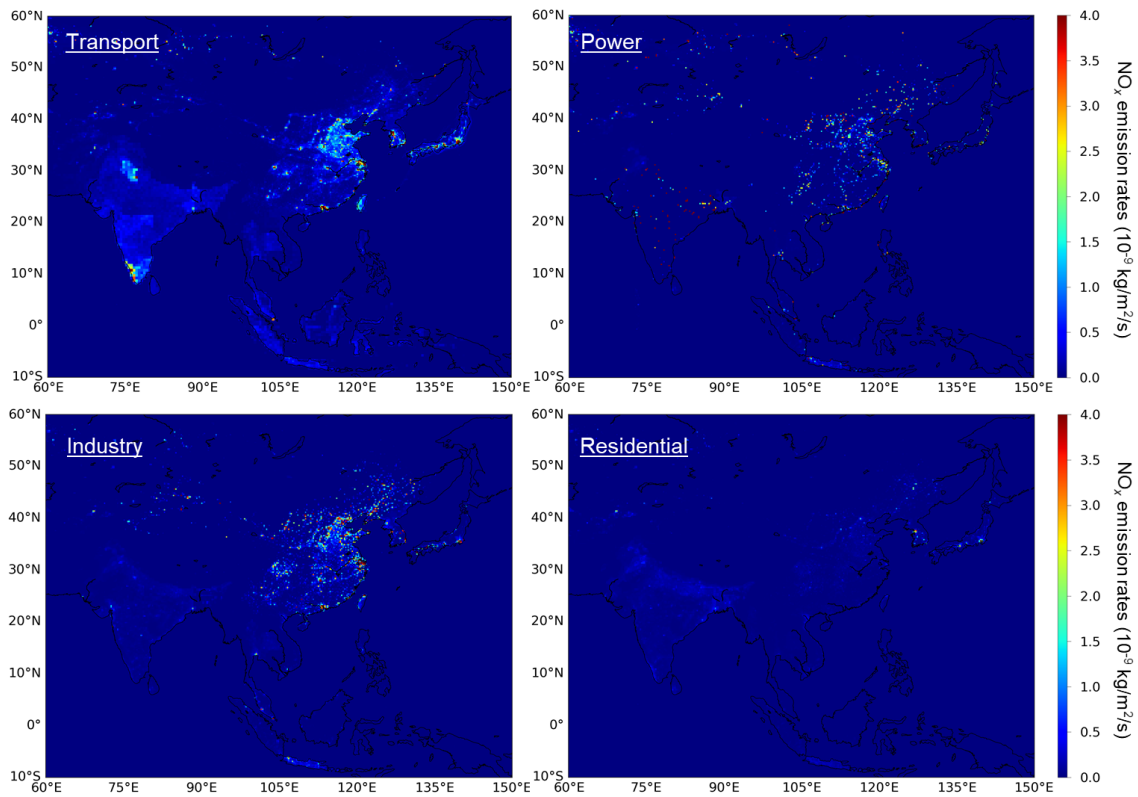

83

84 **Figure S2. Sectoral NO<sub>x</sub> emissions in 2019 used in this study (0.25°×0.25°). MEIC**  
 85 **inventory is used within China.**

86

87

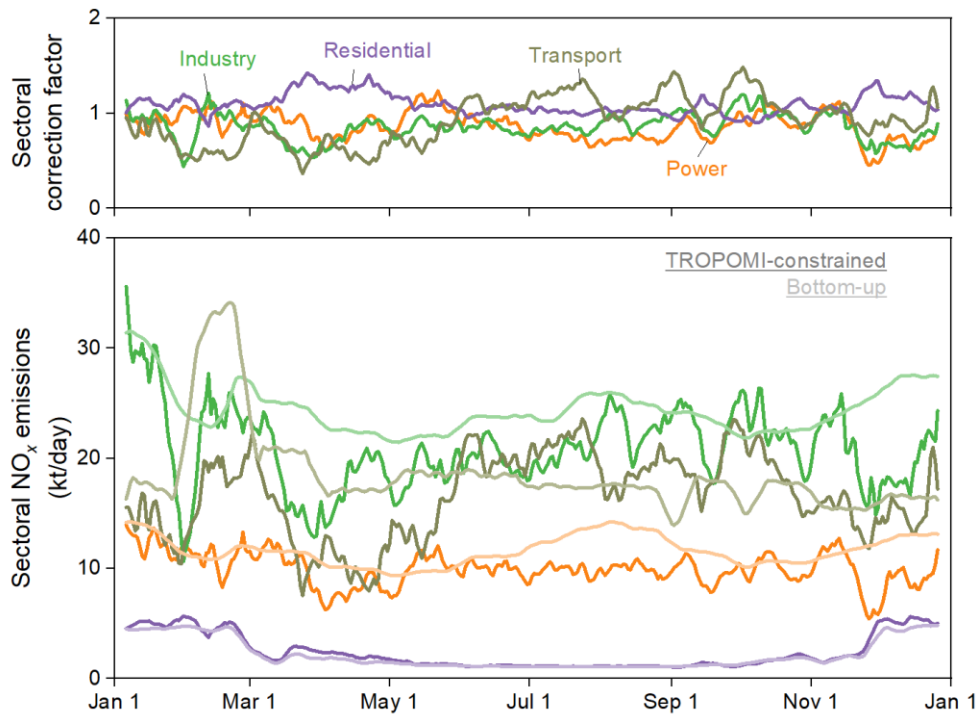

88

89 **Figure S3. The comparison between bottom-up and TROPOMI-constrained sectoral**  
 90 **emissions (base inversion).** The upper panel shows the sectoral correction factors.

91

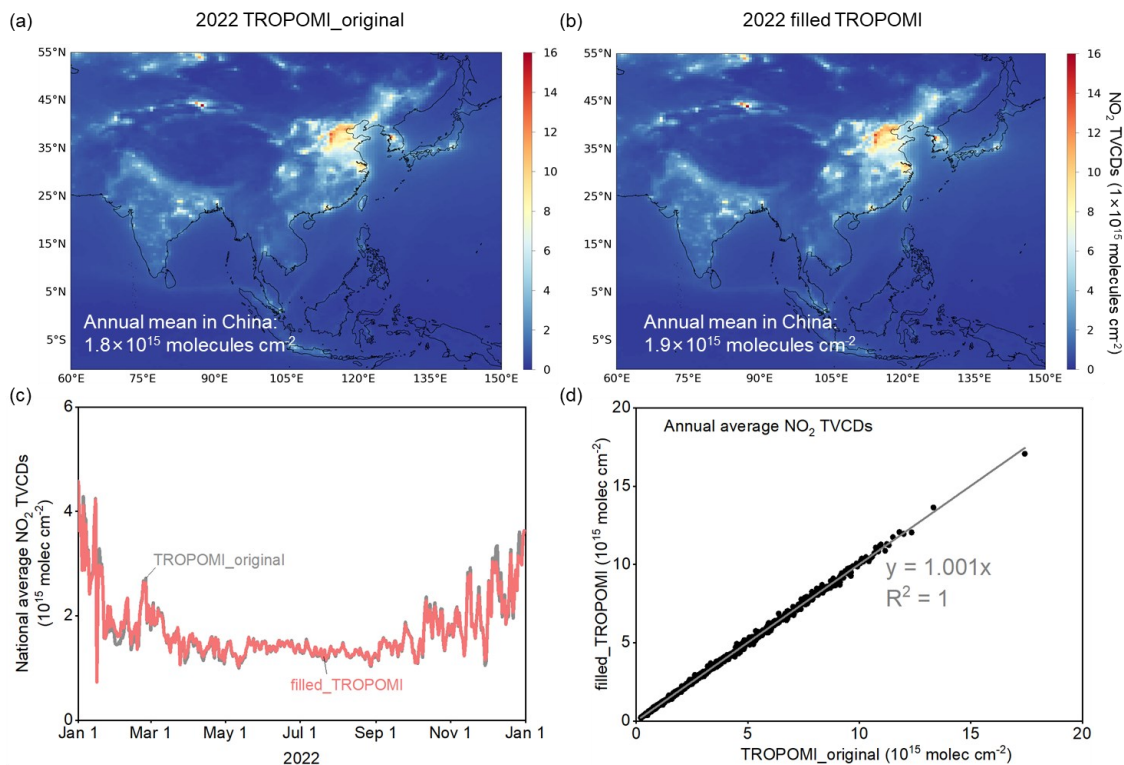

92

93 **Figure S4. The comparison of XGBoost filled TROPOMI and original TROPOMI**  
 94 **NO<sub>2</sub> TVCDs in 2022 in China.** (a) shows the annual mean NO<sub>2</sub> TVCDs of original  
 95 TROPOMI sampling. (b) shows the annual mean NO<sub>2</sub> TVCDs of filled TROPOMI using  
 96 XGBoost method. (c) compares the daily national mean NO<sub>2</sub> TVCDs between original and  
 97 filled TROPOMI. (d) shows the correlation between original and filled TROPOMI NO<sub>2</sub>  
 98 TVCDs grid-by-grid. Note that regions outside China in (a) and (b) are plotted with the  
 99 original TROPOMI data in 2022, while the data in (c) and (d) are exclusively for China.

100

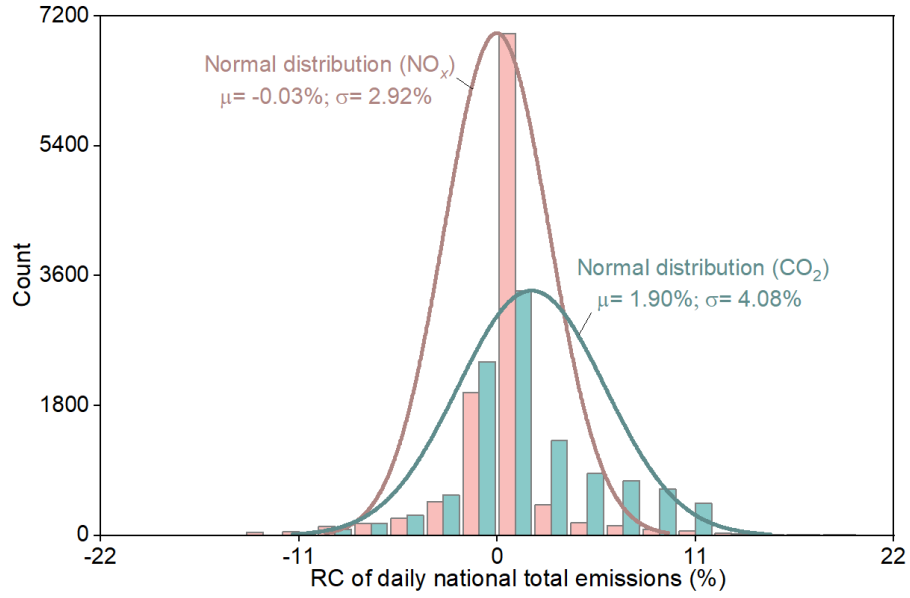

101

102 **Figure S5. RC distribution of daily national total emissions under all tests.** The overall  
 103 distribution of RC of daily national total emissions of NO<sub>x</sub> and CO<sub>2</sub> across all tests adheres  
 104 to a normal distribution. For NO<sub>x</sub>, the mean ( $\mu$ ) and standard deviation ( $\sigma$ ) are -0.03% and  
 105 2.92%, respectively, while for CO<sub>2</sub>, they are 1.90% and 4.08%. Given our discussion  
 106 focusing on CO<sub>2</sub> emissions,  $1\sigma = 4.0\%$  is thus chosen as the threshold for distinguishing  
 107 between consistent and inconsistent impacts.

108



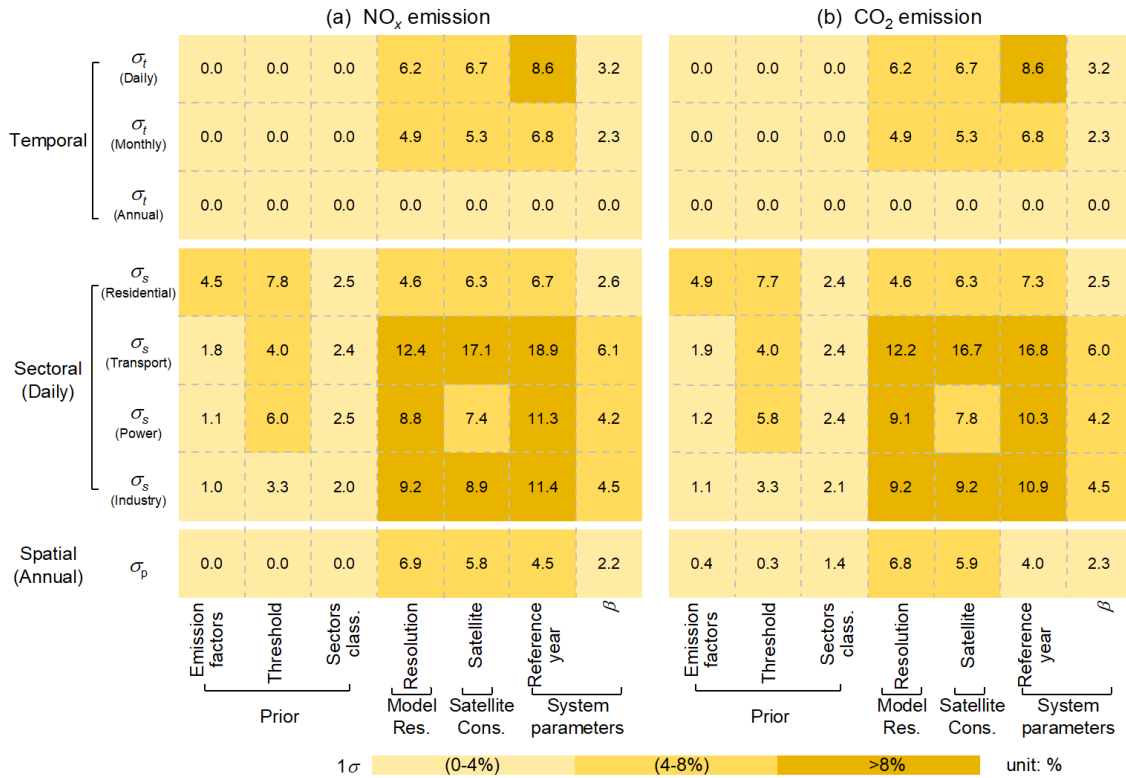

109

110 **Figure S6. An overview of consistency of tests' impacts on (a) NO<sub>x</sub> and (b) CO<sub>2</sub>**  
 111 **emissions across finer scales.** The orange color signifies one standard deviation (1σ),  
 112 reflecting the degree of consistency in the impact of the corresponding test. A larger 1σ  
 113 indicates greater inconsistency. Sectoral emissions consistency is depicted on a daily scale,  
 114 and spatial results are depicted on an annual provincial scale. The numbers within each  
 115 grid represent the corresponding 1σ on a certain dimension under tests.

116

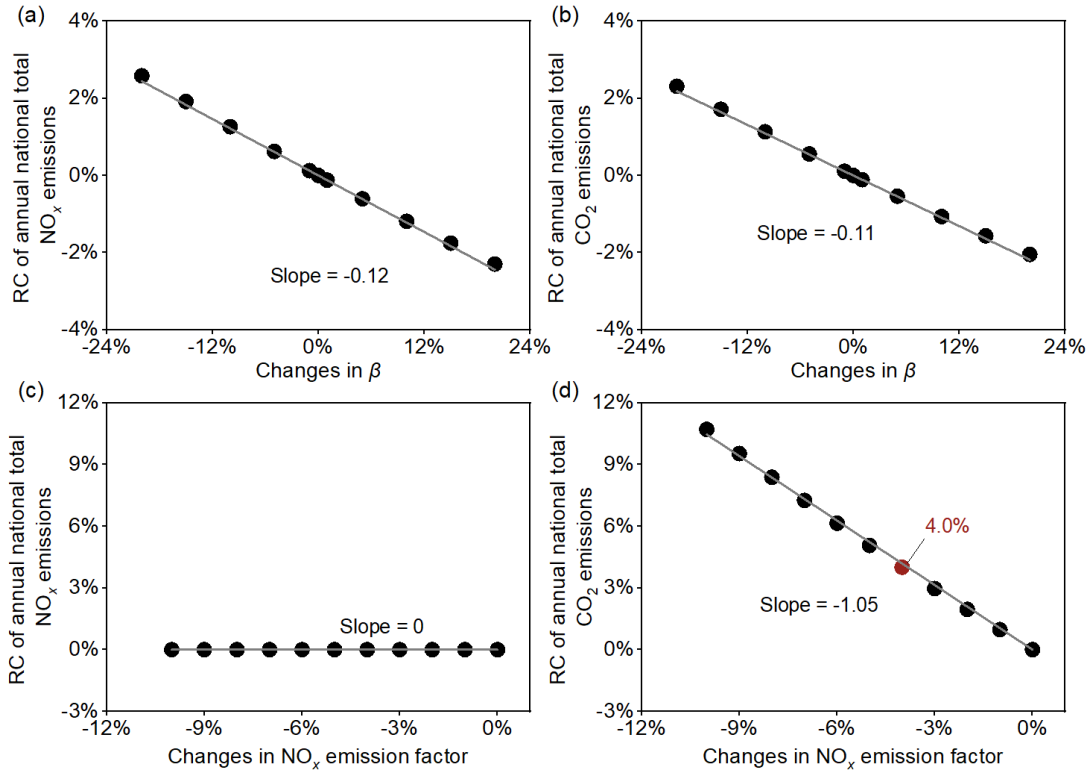

117

118 **Figure S7. Sensitivity of annual national total  $\text{NO}_x$  and  $\text{CO}_2$  emissions to  $\beta$  and  $\text{NO}_x$**   
 119 **emission factor. (a) and (c) present the estimated  $\text{NO}_x$  emissions under a ten-level gradient**  
 120 **for  $\beta$  and emission factor variations. (b) and (d) are plotted for  $\text{CO}_2$  emissions as (a) and**  
 121 **(c).**

122

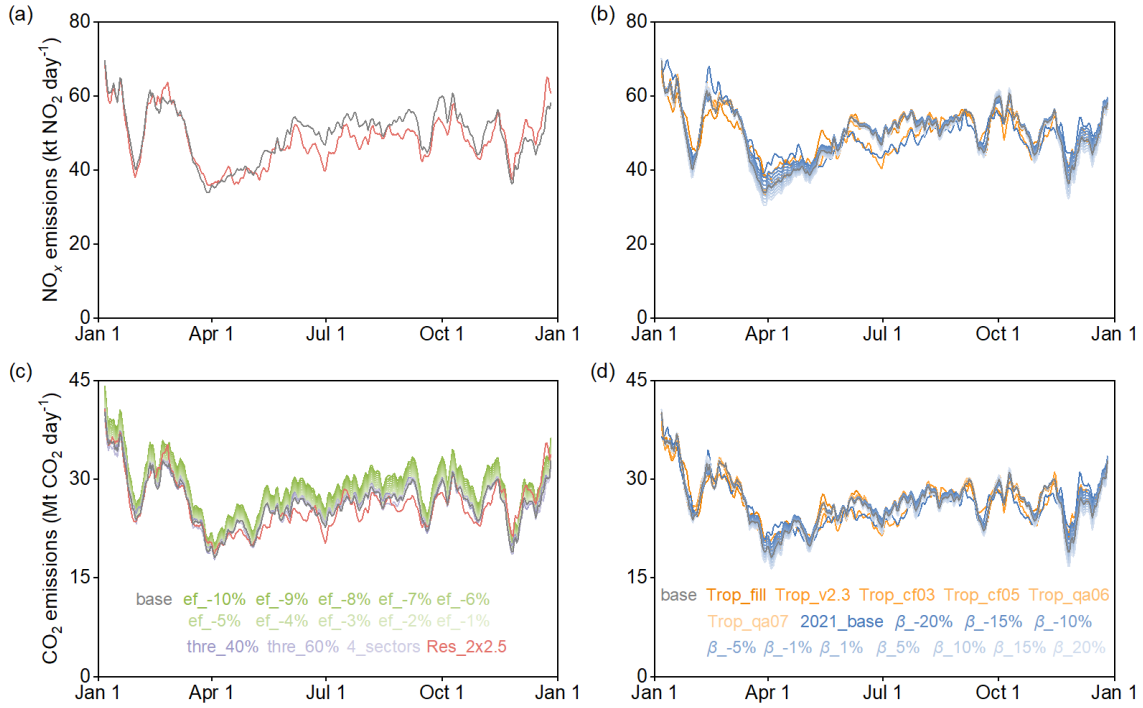

123

124 **Figure S8. Ten-day moving average NO<sub>x</sub> and CO<sub>2</sub> emissions in 2022 under different**  
 125 **sensitivity tests. (a) and (b) present the ten-day moving NO<sub>x</sub> emissions under all tests and**  
 126 **base. (c) and (d) are plotted for CO<sub>2</sub> emissions as (a) and (b).**

127

128

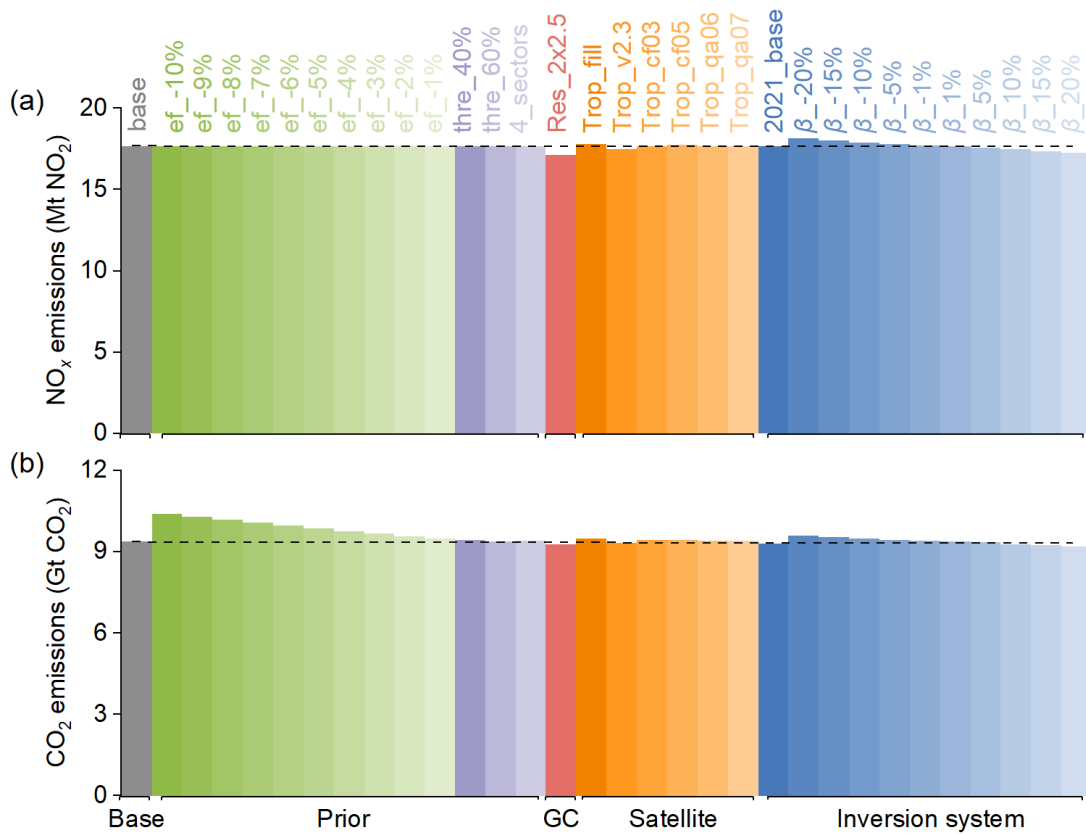

129

130 **Figure S9. Comparison of total (a) NO<sub>x</sub> and (b) CO<sub>2</sub> emissions in 2022 under various**  
 131 **sensitivity tests. Label above each column refer to the corresponding tests.**

132

133

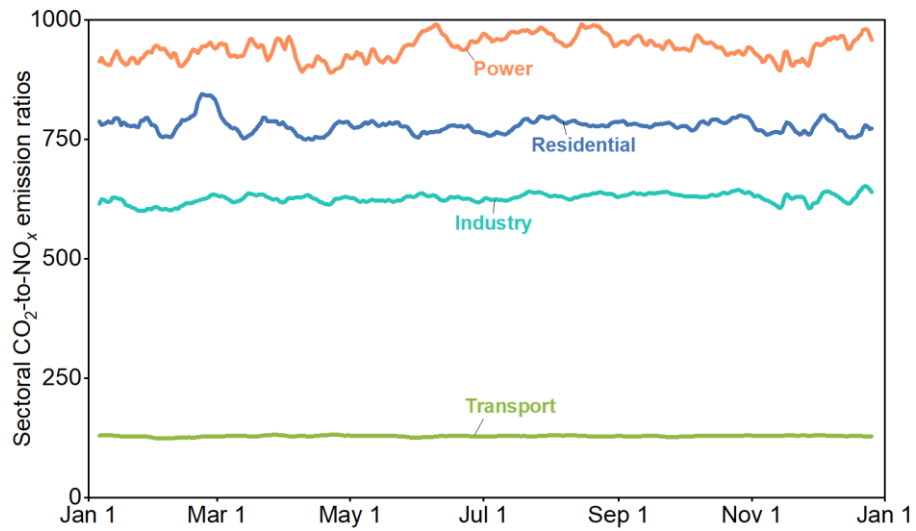

134

135 **Figure S10. Sectoral CO<sub>2</sub>-to-NO<sub>x</sub> emission ratios in 2022 under base inversion. Sectors**  
136 **are color-coded.**

137

138

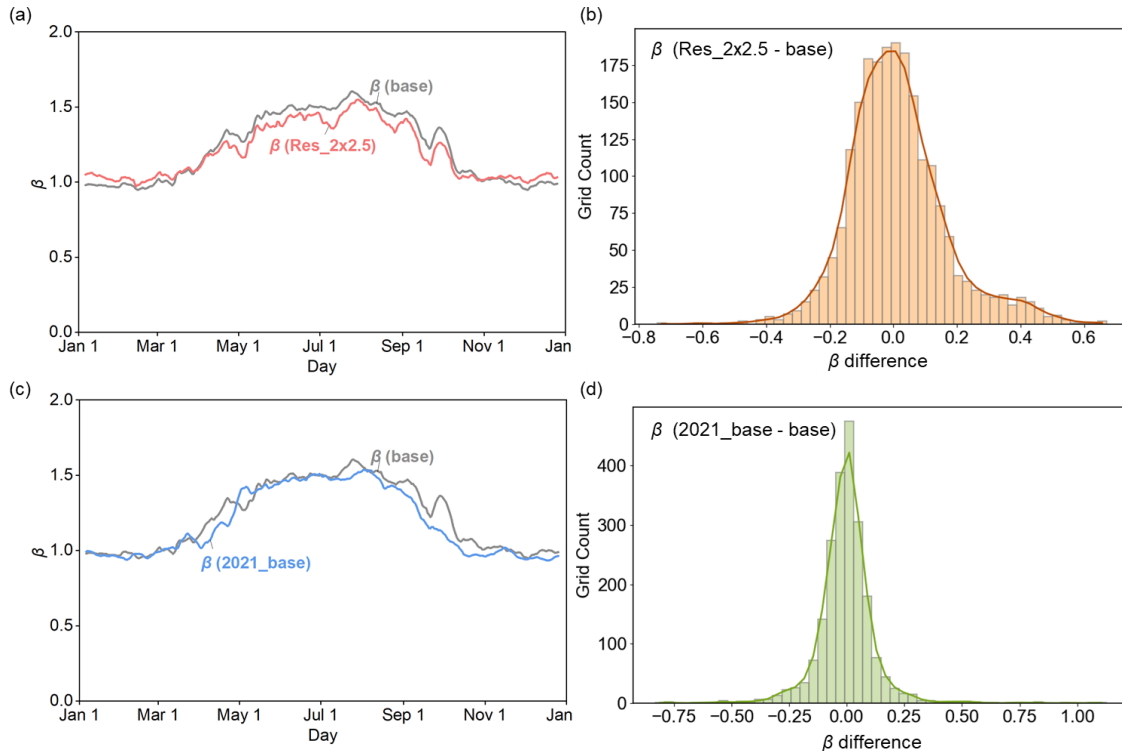

139

140 **Figure S11. Comparison of  $\beta$  between Res\_2x2.5 and base, 2021\_base and base.** (a)  
 141 and (c) compare the daily  $\beta$  dynamics between Res\_2x2.5 and base, and between  
 142 2021\_base and base, respectively. (b) and (d) present the grid distribution of  $\beta$  variance  
 143 between Res\_2x2.5 and base, and between 2021\_base and base, respectively.

144

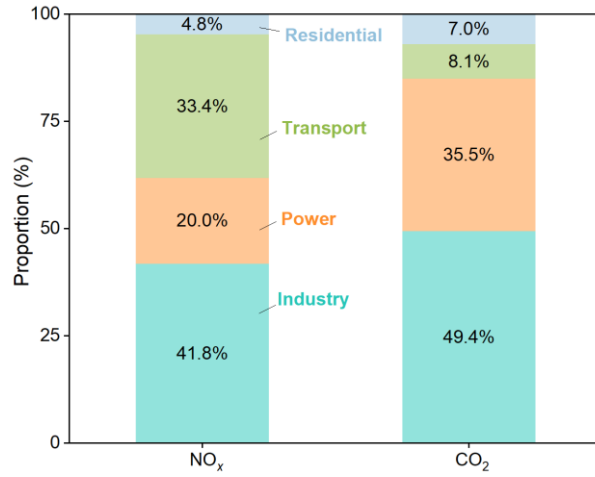

145

146 **Figure S12. Sectoral contribution to total NO<sub>x</sub> and CO<sub>2</sub> emissions in 2022 under base**  
 147 **inversion.** Sectors are color-coded.

148

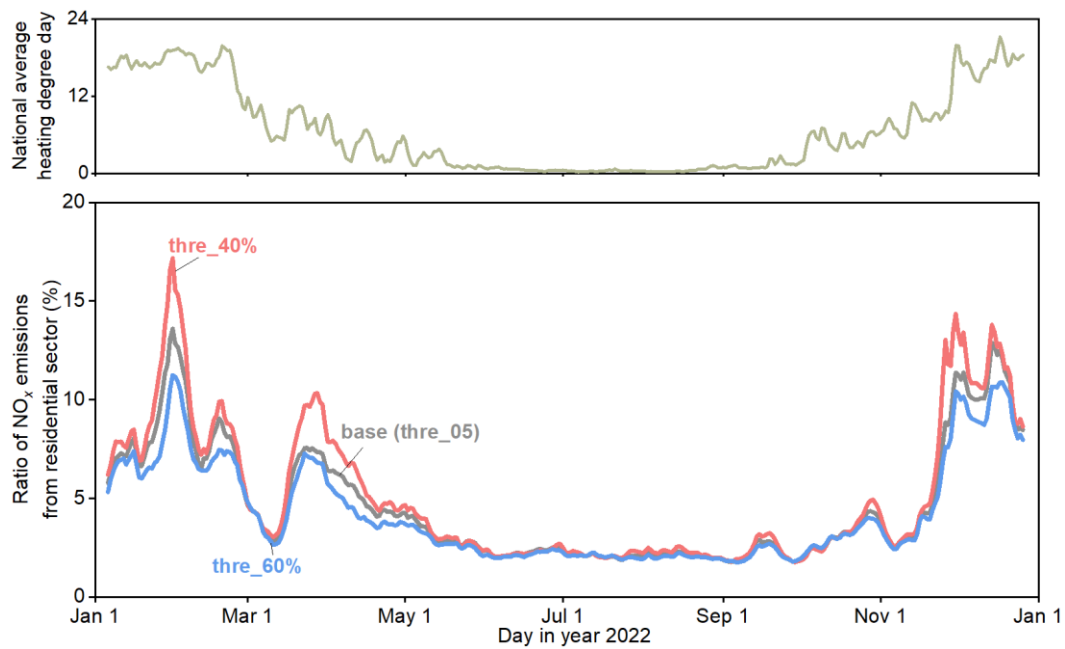

149

150 **Figure S13. The comparison of proportion attributing total TROPOMI-constrained**  
 151 **NO<sub>x</sub> emissions to the residential sector.** Black, red, and blue lines refer to the base,  
 152 thre\_40%, and thre\_60% inversions, respectively. The upper panel displays the temporal  
 153 variation of the national average heating degree day.

154



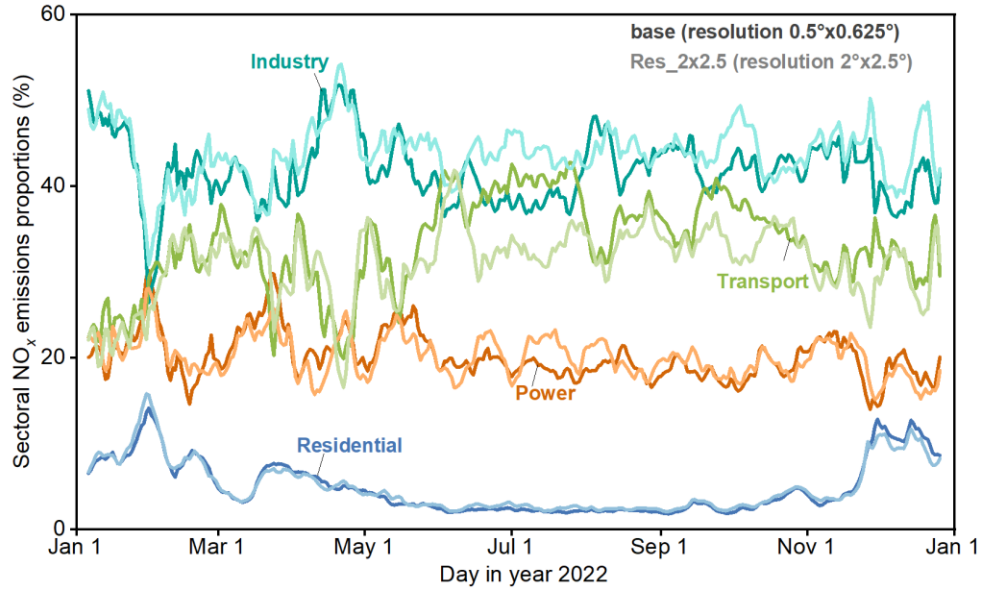

155

156 **Figure S14. The comparison of the sectoral proportion of TROPOMI-constrained**  
 157 **NO<sub>x</sub> emissions.** Sectors are color-coded. Deep color refers to the base inversion, and light  
 158 color represents the Res\_2×2.5.

159

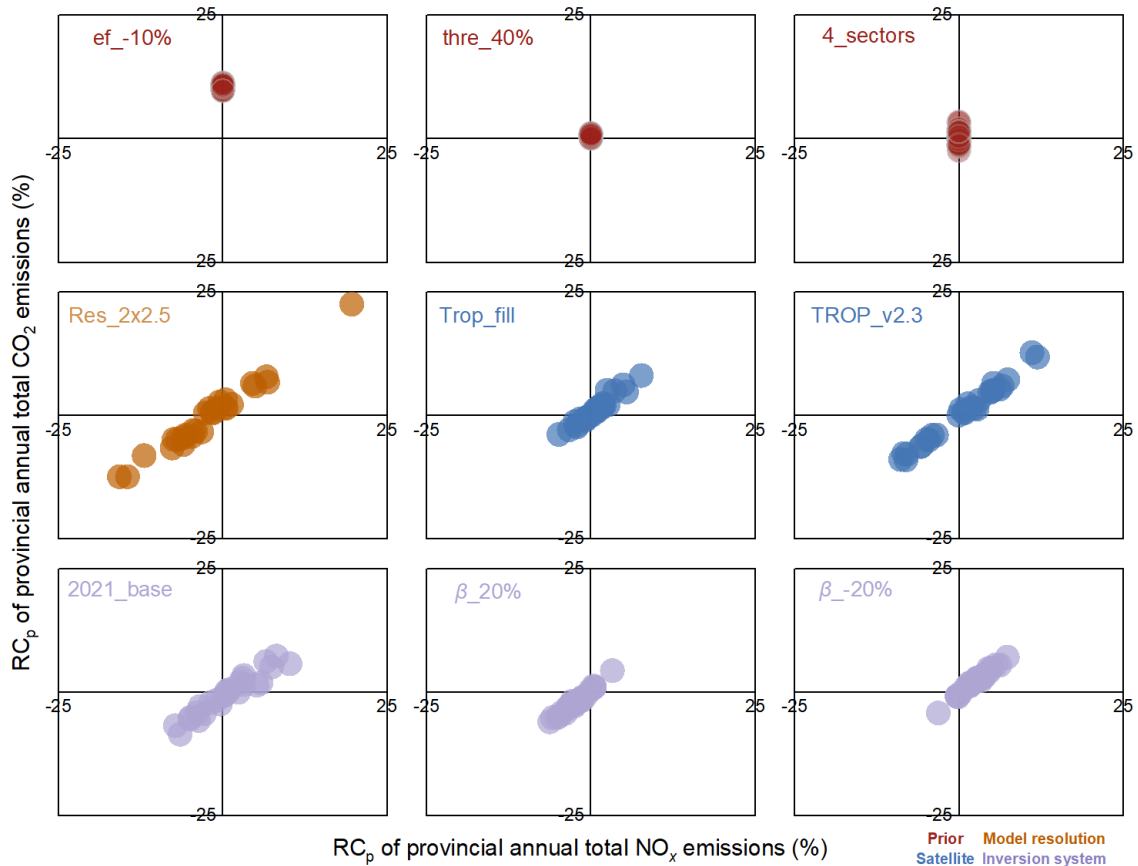

160

161 **Figure S15. Correlation between RC<sub>p</sub> in provincial annual total NO<sub>x</sub> and CO<sub>2</sub>**  
 162 **emissions.** Scatters in red, orange, blue, and purple colors show the results from the tests  
 163 on prior, model resolution, satellite retrievals, and inversion system parameters,  
 164 respectively.

165

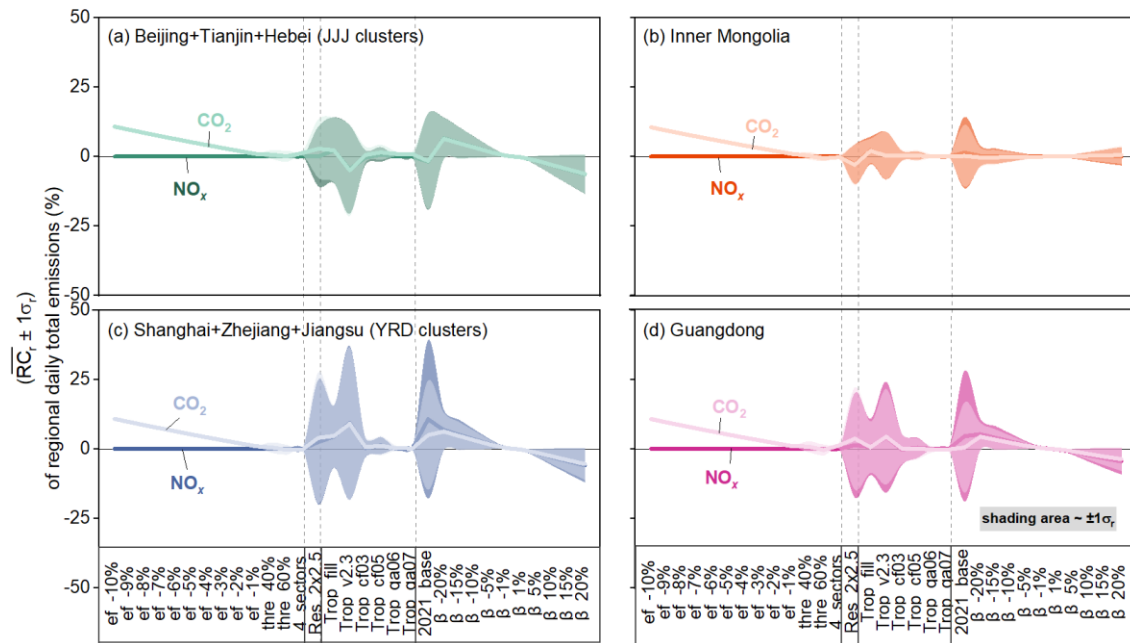

166

167 **Figure S16. Response of regional total NO<sub>x</sub> and CO<sub>2</sub> emissions under tests on a daily**  
 168 **scale. (a), (b), (c), and (d) show the  $\overline{RC}_r \pm 1\sigma_r$  of daily NO<sub>x</sub> (deep color) and CO<sub>2</sub> (light**  
 169 **color) emissions triggered by different tests in Jing-Jin-Ji clusters (Beijing, Tianjin, and**  
 170 **Hebei), Inner Mongolia, Yangtze River Delta clusters (Shanghai, Zhejiang, and Jiangsu),**  
 171 **and Guangdong.**

172

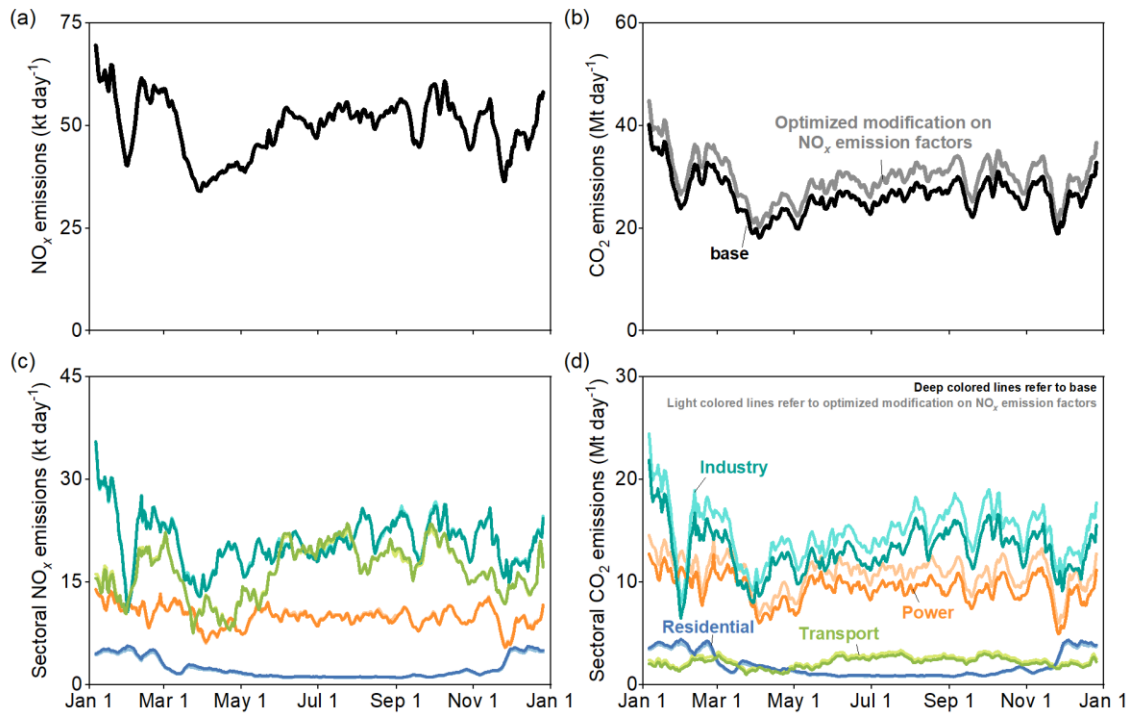

173

174 **Figure S17. Comparison of daily NO<sub>x</sub> and CO<sub>2</sub> emissions between base and situation**  
 175 **with iteratively optimized modification on NO<sub>x</sub> emission factors. (a) and (c) present the**  
 176 **total and sectoral NO<sub>x</sub> emissions under base (deep color) and situation with iteratively**  
 177 **optimized modification on NO<sub>x</sub> emission factors (light color). (b) and (d) are plotted for**  
 178 **CO<sub>2</sub> as (a) and (c).**

**Table S1. Data sources used in the bottom-up estimates.**

| Steps                                   | Corresponding MEIC sector           | Adopted data                           | Data source                                                                                                                                                      |
|-----------------------------------------|-------------------------------------|----------------------------------------|------------------------------------------------------------------------------------------------------------------------------------------------------------------|
| Monthly emission estimation*            | Power                               | Thermal power generation               | National Bureau of Statistics<br>( <a href="https://data.stats.gov.cn/english/easyquery.htm?cn=C01">https://data.stats.gov.cn/english/easyquery.htm?cn=C01</a> ) |
|                                         | Cement                              | Cement production                      |                                                                                                                                                                  |
|                                         | Iron                                | Iron production                        |                                                                                                                                                                  |
|                                         | Other industry                      | Manufacturing value added              |                                                                                                                                                                  |
|                                         | On-road                             | Road Freight turnover                  |                                                                                                                                                                  |
|                                         | Off-road                            | Construction area                      |                                                                                                                                                                  |
| Dissolving monthly emissions into daily | Residential/<br>Residential-biofuel | Population-weighted heating degree day | Calculation based on the 2m temperature data from the ERA5 dataset                                                                                               |
|                                         | Power/<br>Cement/<br>Other industry | Coal consumption                       | (Wu et al., 2022)                                                                                                                                                |
|                                         | Iron                                | Operating rates of electric furnace    | The custeel database<br>( <a href="https://www.custeel.com/">https://www.custeel.com/</a> )                                                                      |
|                                         | On-road/<br>Off-road                | Baidu migration data                   | The Baidu database<br>( <a href="https://qianxi.baidu.com/">https://qianxi.baidu.com/</a> )                                                                      |

180 \*Production index are used to differentiate January and February from the combined first two months' data in the National  
181 Bureau of Statistics.

182

183

184 **Reference**

- 185 Cheng, J., Tong, D., Liu, Y., Bo, Y., Zheng, B., Geng, G., He, K., and Zhang, Q.: Air quality and  
186 health benefits of China's current and upcoming clean air policies, *Faraday Discussions*, 226,  
187 584-606, <https://doi.org/10.1039/D0FD00090F>, 2021.
- 188 Crippa, M., Solazzo, E., Huang, G., Guizzardi, D., Koffi, E., Muntean, M., Schieberle, C., Friedrich,  
189 R., and Janssens-Maenhout, G.: High resolution temporal profiles in the Emissions Database for  
190 Global Atmospheric Research, *Scientific Data*, 7, 121, 10.1038/s41597-020-0462-2, 2020.
- 191 Geng, G., Liu, Y., Liu, Y., Liu, S., Cheng, J., Yan, L., Wu, N., Hu, H., Tong, D., Zheng, B., Yin, Z., He,  
192 K., and Zhang, Q.: Efficacy of China's clean air actions to tackle PM<sub>2.5</sub> pollution between 2013  
193 and 2020, *Nature Geoscience*, 17, 987-994, 10.1038/s41561-024-01540-z, 2024.
- 194 Li, S., Wang, S., Wu, Q., Zhang, Y., Ouyang, D., Zheng, H., Han, L., Qiu, X., Wen, Y., Liu, M., Jiang,  
195 Y., Yin, D., Liu, K., Zhao, B., Zhang, S., Wu, Y., and Hao, J.: Emission trends of air pollutants and  
196 CO<sub>2</sub> in China from 2005 to 2021, *Earth Syst. Sci. Data*, 15, 2279-2294,  
197 <https://doi.org/10.5194/essd-15-2279-2023>, 2023.
- 198 McDuffie, E. E., Smith, S. J., O'Rourke, P., Tibrewal, K., Venkataraman, C., Marais, E. A., Zheng, B.,  
199 Crippa, M., Brauer, M., and Martin, R. V.: A global anthropogenic emission inventory of  
200 atmospheric pollutants from sector- and fuel-specific sources (1970–2017): an application of the  
201 Community Emissions Data System (CEDS), *Earth Syst. Sci. Data*, 12, 3413-3442, 10.5194/essd-  
202 12-3413-2020, 2020.
- 203 Wu, N., Geng, G., Qin, X., Tong, D., Zheng, Y., Lei, Y., and Zhang, Q.: Daily Emission Patterns of  
204 Coal-Fired Power Plants in China Based on Multisource Data Fusion, *ACS Environmental Au*,  
205 <https://doi.org/10.1021/acsenvironau.2c00014>, 2022.
- 206 Zheng, B., Tong, D., Li, M., Liu, F., Hong, C., Geng, G., Li, H., Li, X., Peng, L., Qi, J., Yan, L., Zhang,  
207 Y., Zhao, H., Zheng, Y., He, K., and Zhang, Q.: Trends in China's anthropogenic emissions since  
208 2010 as the consequence of clean air actions, *Atmos. Chem. Phys.*, 18, 14095-14111,  
209 10.5194/acp-18-14095-2018, 2018.

210

211
